# Supplementary material
Source: Research Square preprint supplement (doi:10.21203/rs.3.rs-8868681/v1)
Supplement: Supplementary file 2 [file 69992b9a40a62aaafec8d335.docx]

**Lateral Epitaxy Suppresses Self-Trapped Excitons in 2D perovskites**

Chong Peng1†, Zisheng Tang1†, Jieheng Lv1†, Shujing Ren1†, Dafu Zhao1, Xiaoqian Wang1, Kefeiyang Hu1, Manrui Liu1, Damin Liu1, Lindong Wang1, Sicheng Luo1, Zhe Pang1, Xingbo Huang1, Yingfei Liu1, Zhicheng Shen1, Jiaqian Que1 and Yong Liu1*

1 State Key Laboratory of Advanced Technology for Materials Synthesis and Processing, International School of Materials Science and Engineering (ISMSE), Wuhan University of Technology, Wuhan 430070, China.

* Correspondence: [liuyong3873@whut.edu.cn](mailto:liuyong3873@whut.edu.cn);

† These authors contributed equally to this work.

**Methods**

**Chemicals and reagents.**

Organic solvents, including dimethyl sulfoxide (DMSO 99.90%), chlorobenzene (CB 99.50%), N, N-Dimethylformamide (DMF 99.50%) and acetonitrile (ACN 99.50%) were purchased from Sinopharm Chemical Reagent Co., Ltd. And solid chemicals, including 2-phenylethylamine hydrochloride (PEACl 99.00%), lead chloride (PbCl2 99.99%) were purchased from Macklin Chemical Reagent Co., Ltd., phenethylammonium bromide (PEABr 98.00%), lead bromide (PbBr2 99.99%), tin (II) bromide (SnBr2 99.00%) were purchased from Aladdin Chemical Reagent Co., Ltd. All organic solvents and solid chemicals were used as received without further purification.

**Synthesis of PEA2PbCl4 single-crystal sheets.**

A stock solution of PEA2PbCl4 was prepared by dissolving 100 μmol of PEACl and 50 μmol of PbCl2 in a mixed solvent of 2 ml DMSO, 4 ml DMF, and 4 mL CB. Then, 100 μl of the stock solution was added dropwise to 12 ml of a CB/ ACN co-solvent with a volume ratio between 1.5:1.0 and 2.0:1.0 to obtain a diluted solution for single-crystal growth. Subsequently, 8 μl of the diluted solution was dropped onto a SiO2 (300 nm)/Si substrate placed at the bottom of a sealed glass vial, which was positioned on a hot plate set to 65 °C. After complete evaporation of diluted solution over 16 minutes, PEA2PbCl4 single-crystal sheets were obtained on the substrate.

**Synthesis of PEA2PbCl4-PEA2Pb1-xSnxBr4 heterostructures.**

A stock solution for PEA2Pb1-xSnxBr4 was prepared by dissolving 100 μmol of PEABr and 50 μmol of MBr2 (M=Pb, Sn) in a DMF/CB co‑solvent (5 ml each). Then, 100 μl of each stock solution was added dropwise to 12 ml of a CB/ ACN co‑solvent with the following CB:ACN volume ratios=2.5:1.0 for PEA2PbBr4, 4.0:1.0 for PEA2Pb0.5Sn0.5Br4, and 4.5:1.0 for PEA2SnBr4 to obtain a diluted solution for heterostructures growth. Subsequently, 7 μl of the diluted solution was dropped onto a SiO2/Si (300nm) substrate pre-grown with PEA2PbCl4 single-crystal sheets and placed at the bottom of a sealed glass vial, which was positioned on a hot plate set to 50 °C. After complete evaporation of diluted solution over 45 minutes, PEA2PbCl4-PEA2Pb1-xSnxBr4 heterostructures were obtained on the substrate.

**Characterizations**

All samples were characterized by X-ray diffraction (XRD) using the Bruker D8 X-ray diffractometer under Cu Kα radiation (λ=1.54056 Å, 40kV, and 40mA). The bright-field optical images were collected by a custom microscope (RX50M). PL images were captured using an Olympus BX53 as the excitation source. All PL spectra were measured using Coherent OBIS 325 nm laser as the excitation source. The scanning electron microscope images were collected in a S4800 with an accelerating voltage of 5.0 kV. Atomic Force Microscope images were recorded in tapping mode using an atomic force microscope (Bruker Dimension ICON-IR). The X-ray photoelectron spectroscopy of the samples was carried out using a Thermo Scientific Kα XPS spectrometer equipped with a monochromatic Al-Kα x-ray source.

**TEM Characterization**

TEM images and SAED patterns of PEA2PbCl4 single-crystal sheets were acquired using FEI Titan-X 60-300 microscope operated at 200kV. TEM images and SAED patterns of PEA2PbCl4-PEA2Pb1-xSnxBr4 heterostructures were acquired using JEM-F200 Multi-purpose Electron Microscope operated at 200kV.

**DFT Calculation**

The Vienna Ab Initio Package (VASP) was employed to perform all the density functional theory (DFT) calculations within the generalized gradient approximation (GGA) using the Perdew, Burke, and Enzerhof (PBE) formulation1−3. The projected augmented wave (PAW) potentials were applied to describe the ionic cores and take valence electrons into account using a plane wave basis set with a kinetic energy cutoff of 450 eV4,5. Partial occupancies of the Kohn-Sham orbitals were allowed using the Gaussian smearing method and a width of 0.1 eV. The electronic energy was considered self-consistent when the energy change was smaller than 10-5 eV. A geometry optimization was considered convergent when the force change was smaller than 0.05 eV/Å. Grimme’s DFT-D3 methodology was used to describe the dispersion interactions6. The Brillouin zone integral utilized the structures of 2×2×1 monkhorst pack K-point sampling. The energy Edis. was calculated

Edis.=(Etotal-Egroud) (1)

Where Etotal is the total energy of distorted structure. Egroud is ground state energy the energy.


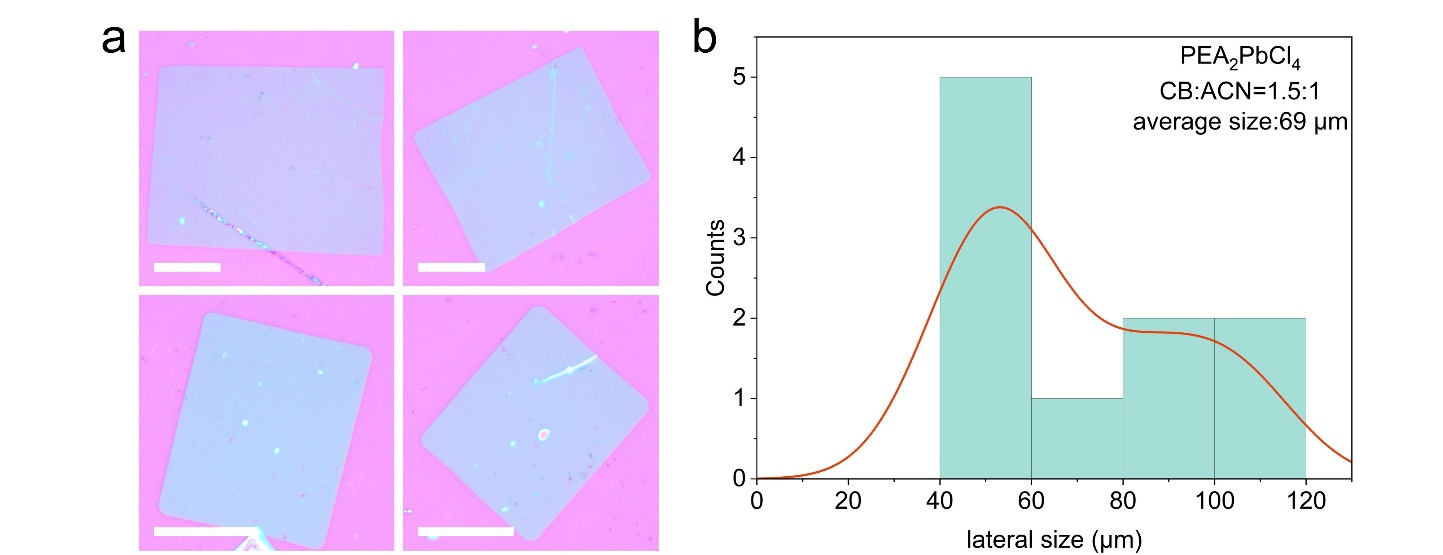


**Fig. S1. O****ptical images of PEA2PbCl4 single-crystal sheets grown under the conditions CB: ACN volume ratios=1.5:1.** (**a**)Optical images of PEA2PbCl4 single-crystal sheets. Scale bar: 30 μm. (**b**) Size distribution plot of PEA2PbCl4 single-crystal sheets.


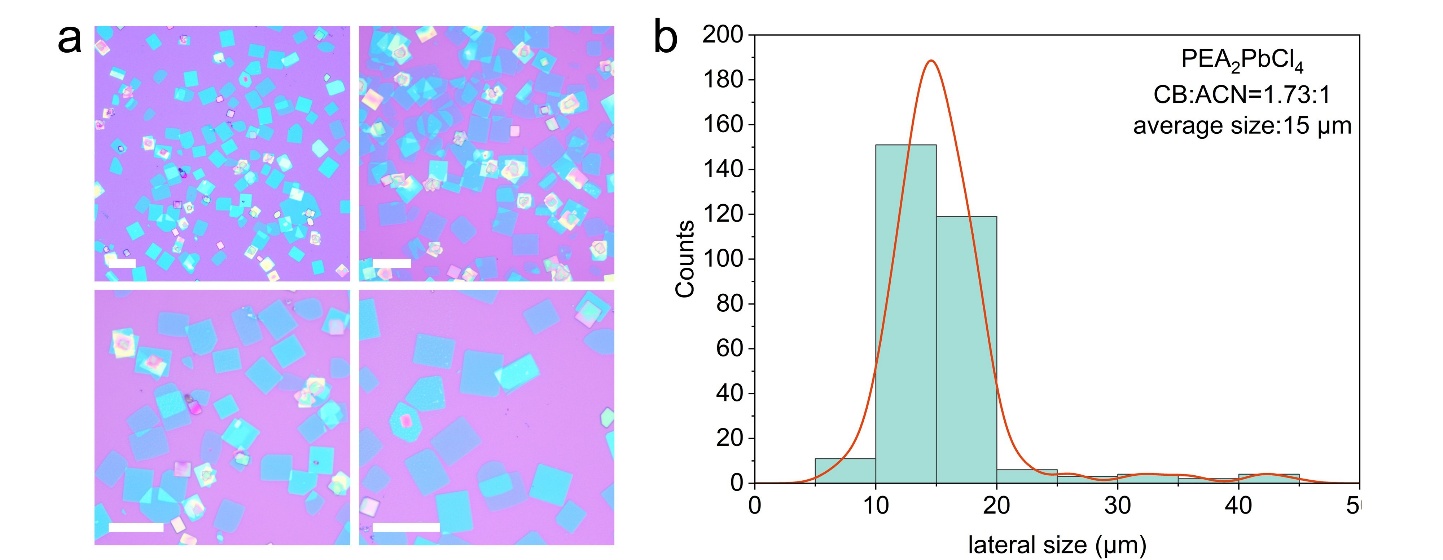


**Fig. S2. Optical images of PEA2PbCl4 single-crystal sheets grown under the conditions CB: ACN volume ratios=1.73:1.** (**a**)Optical images of PEA2PbCl4 single-crystal sheets. Scale bar: 30 μm. (**b**) Size distribution plot of PEA2PbCl4 single-crystal sheets.


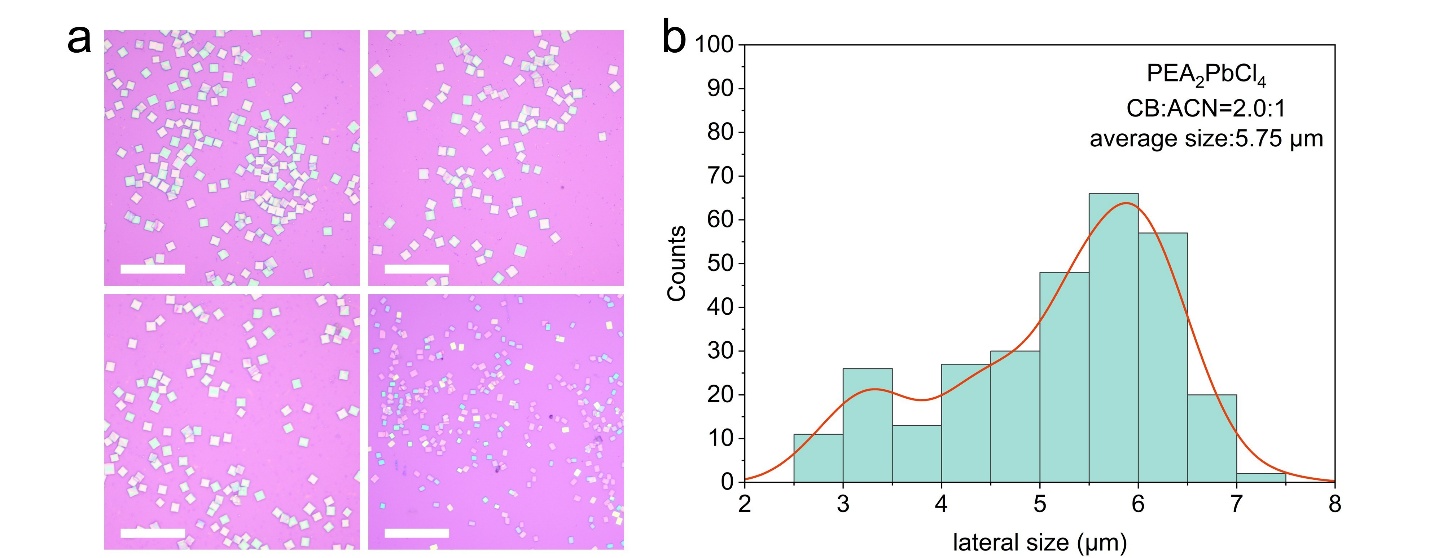


**Fig. S3. Optical images of PEA2PbCl4 single-crystal sheets grown under the conditions CB: ACN volume ratios=2.0:1.** (**a**)Optical images of PEA2PbCl4 single-crystal sheets. Scale bar: 30 μm. (**b**) Size distribution plot of PEA2PbCl4 single-crystal sheets.


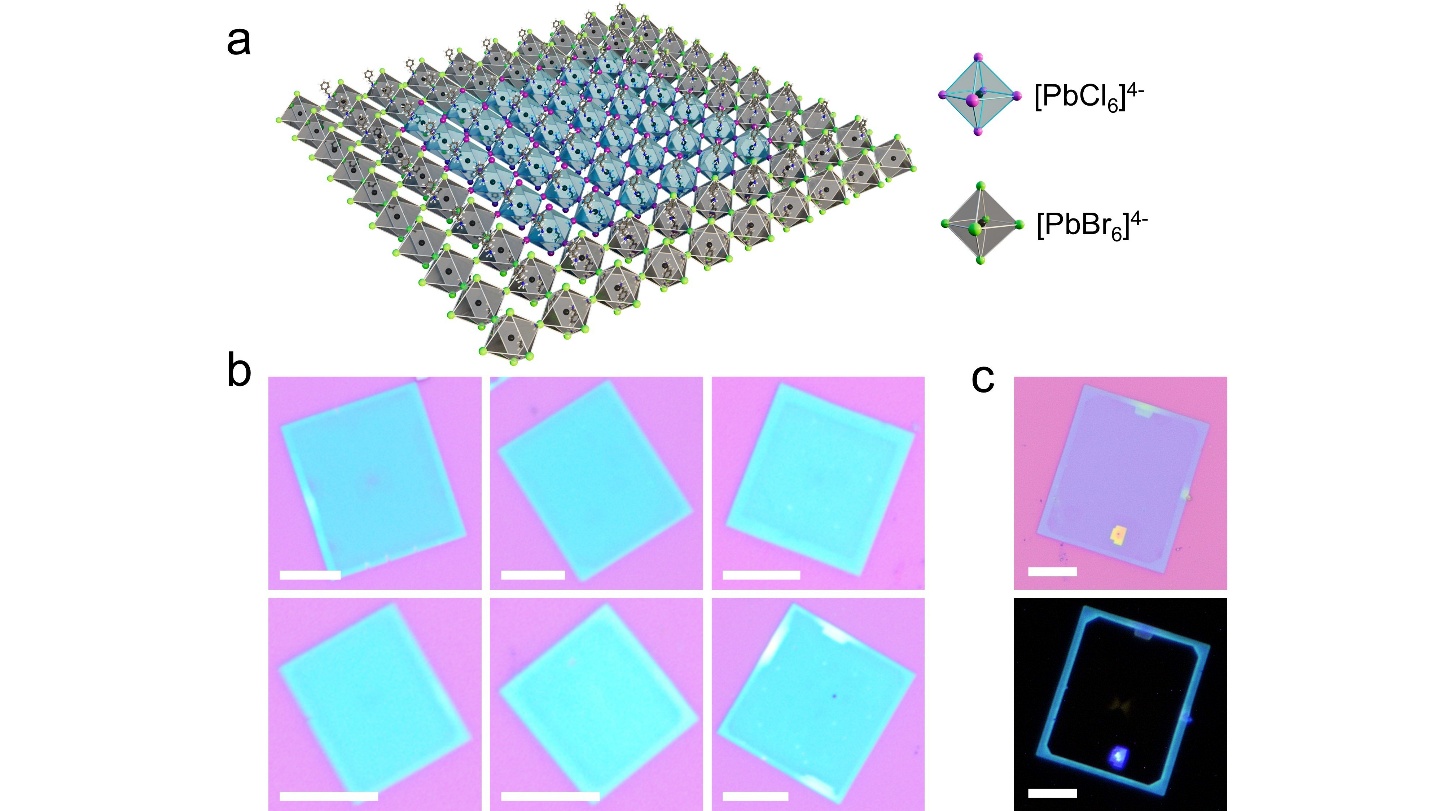


**Fig. S4. The schematic diagram of the heterostructure, the optical images, and the fluorescence images of PEA2PbCl4-PEA2PbBr4.** (**a**) Schematic diagram of the heterostructure of PEA2PbCl4-PEA2PbBr4. (**b**) Optical images of PEA2PbCl4-PEA2PbBr4. Scale bar: 10 μm. (**c**) The optical images and the corresponding images of PEA2PbCl4-PEA2PbBr4. Scale bar: 10 μm.


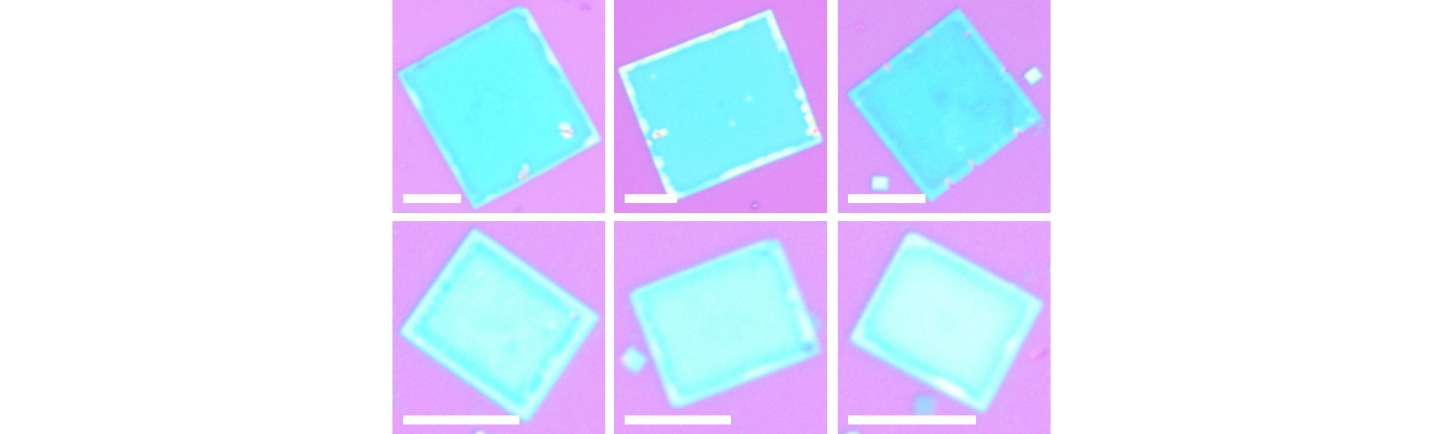


**Fig. S5.** The optical images of PEA2PbCl4-PEA2Pb0.5Sn0.5Br4 heterostructure. Scale bar: 10 μm.


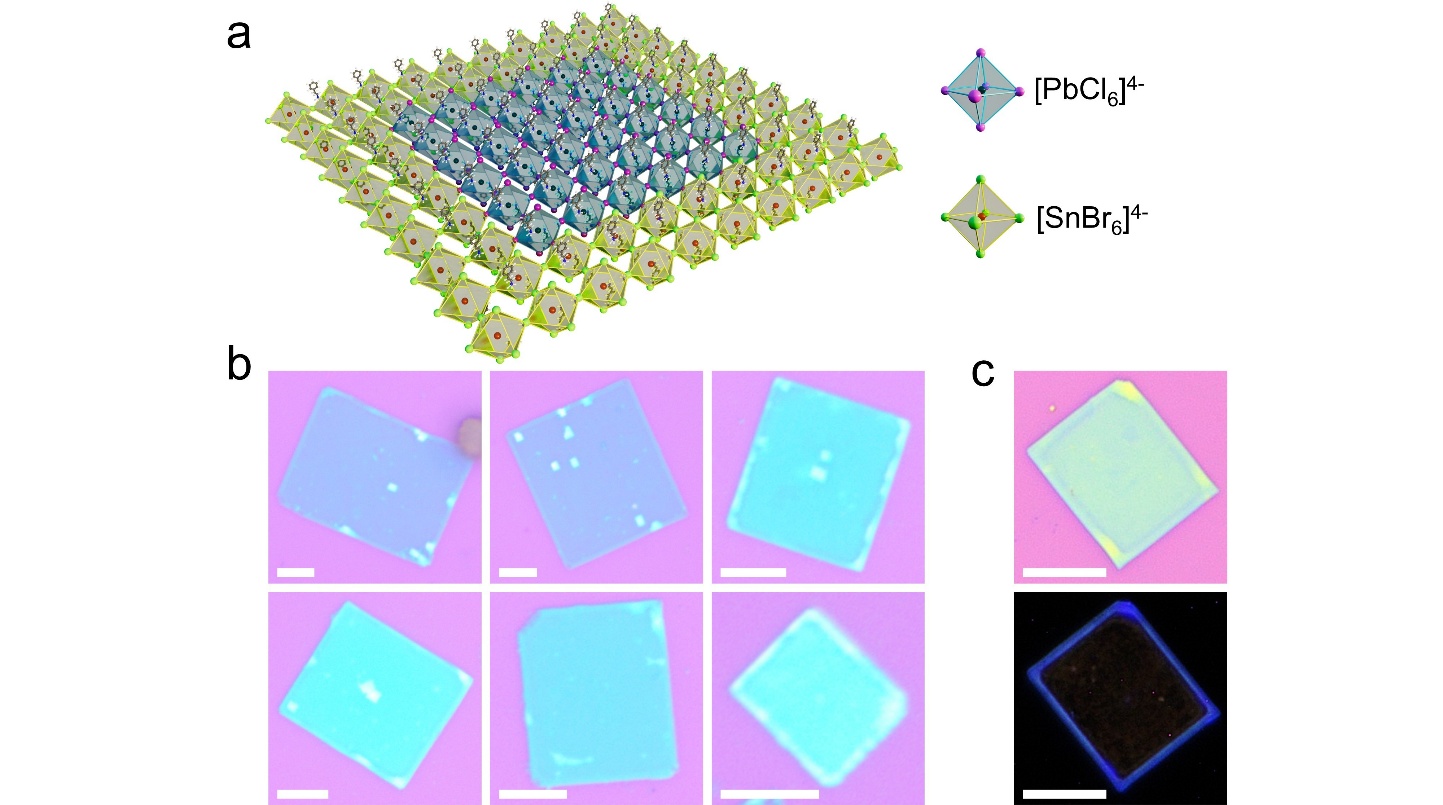


**Fig. S6. The schematic diagram of the heterostructure, the optical images, and the fluorescence images of PEA2PbCl4-PEA2SnBr4.** (**a**) Schematic diagram of the heterostructure of PEA2PbCl4-PEA2SnBr4. (**b**) Optical images of PEA2PbCl4-PEA2SnBr4. Scale bar: 10 μm. (**c**) The optical images and the corresponding fluorescence images of PEA2PbCl4-PEA2SnBr4. Scale bar: 10 μm.


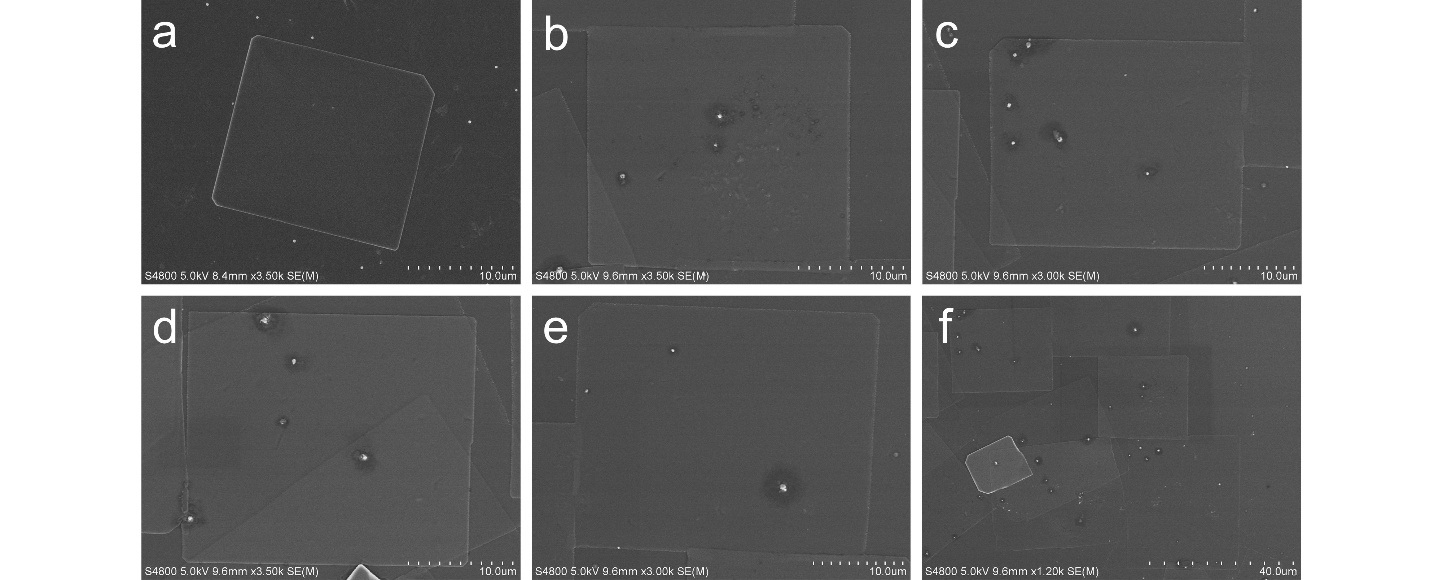


**Fig. S7.** The scanning electron microscopy images of PEA2PbCl4.

**
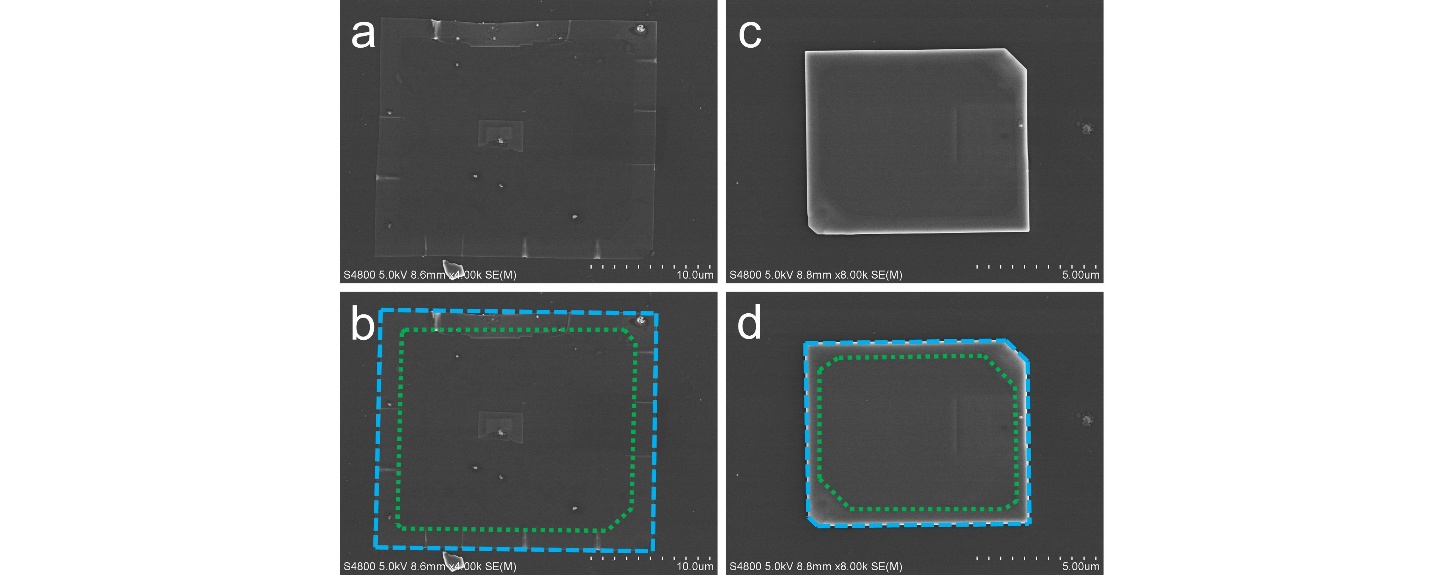
**

**Fig. S8. The scanning electron microscopy images of PEA2PbCl4-PEA2PbBr4 heterostructure and PEA2PbCl4-PEA2SnBr4 heterostructures. The green dashed line highlights the heterostructure interface.** (**a, b**) The SEM images of PEA2PbCl4-PEA2PbBr4 heterostructure. (**c, d**) The SEM images of PEA2PbCl4-PEA2SnBr4 heterostructure.


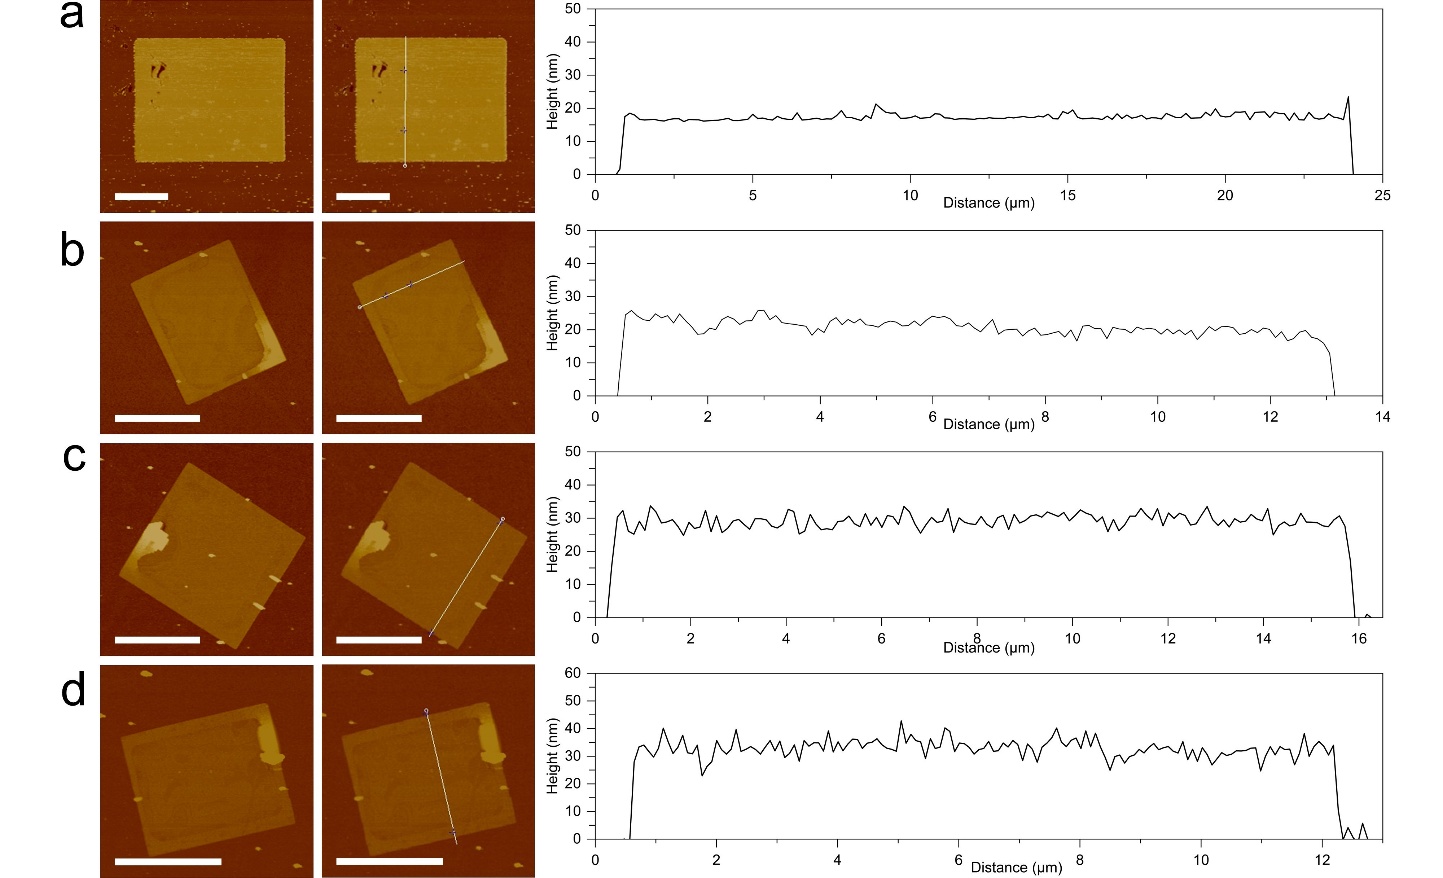


**Fig. S9. The atomic force microscopy images of sheets and the corresponding surface roughness curve.** (**a–d**) single-crystal sheets and surface roughness curve. (**a**) PEA2PbCl4 single crystal sheets. (**b**) PEA2PbCl4-PEA₂PbBr4 heterostructure. (**c**) PEA2PbCl4-PEA2Pb0.5Sn0.5Br4 heterostructure. (**d**) PEA2PbCl4-PEA₂SnBr4 heterostructure. Scale bar: 10 μm.


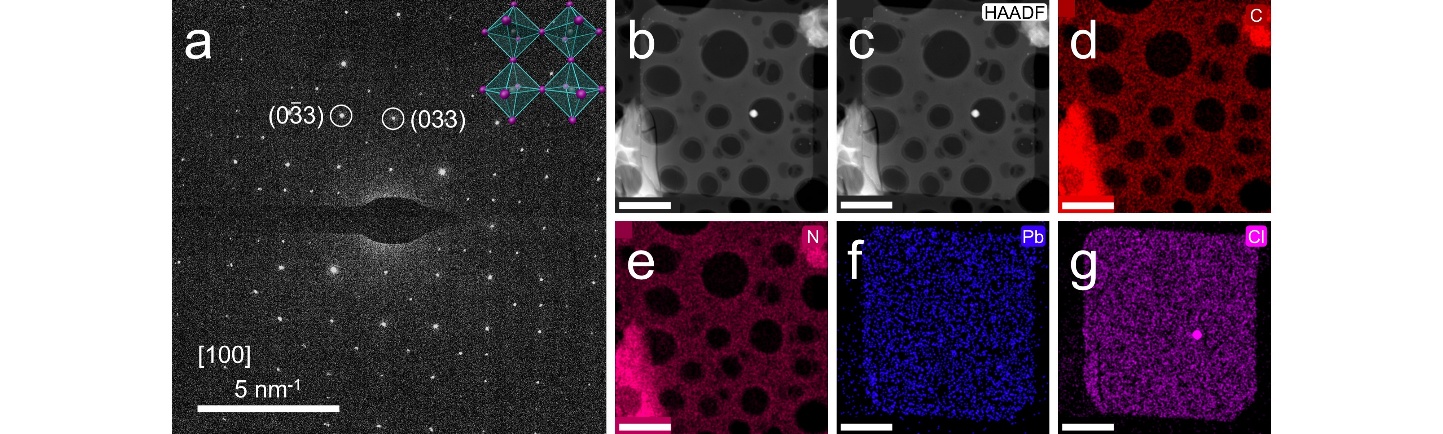


**Fig. S10.** **Structural characterization of PEA2PbCl4 single-crystal sheets.** (**a**) SAED pattern of PEA2PbCl4 single-crystal sheets, the upper right corner shows the schematic diagram of the heterostructure of the selected area. (**b–c**) Low-magnification TEM images of PE2PbCl4 single-crystal sheets. (**d–g**) EDS elemental mappings of PEA2PbCl4 single-crystal sheets. Scale bar: 2 μm.


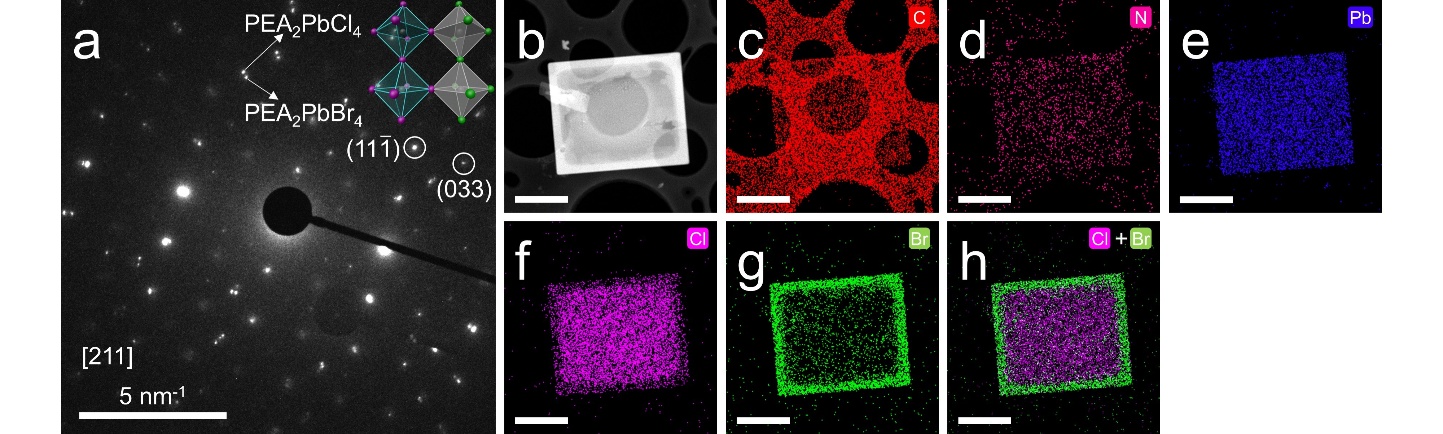


**Fig. S11. Structural characterization of** **PEA2PbCl4-PEA2PbBr4 heterostructure.** (**a**) SAED pattern of PEA2PbCl4-PEA2PbBr4 heterostructure, the upper right corner shows the schematic diagram of the heterostructure of the selected area. (**b**) Low-magnification TEM image of PEA2PbCl4-PEA2PbBr4 heterostructure. (**c-h**) EDS elemental mappings of PEA2PbCl4-PEA2Pb0.5Sn0.5Br4 heterostructure. Scale bar: 2.5 μm.


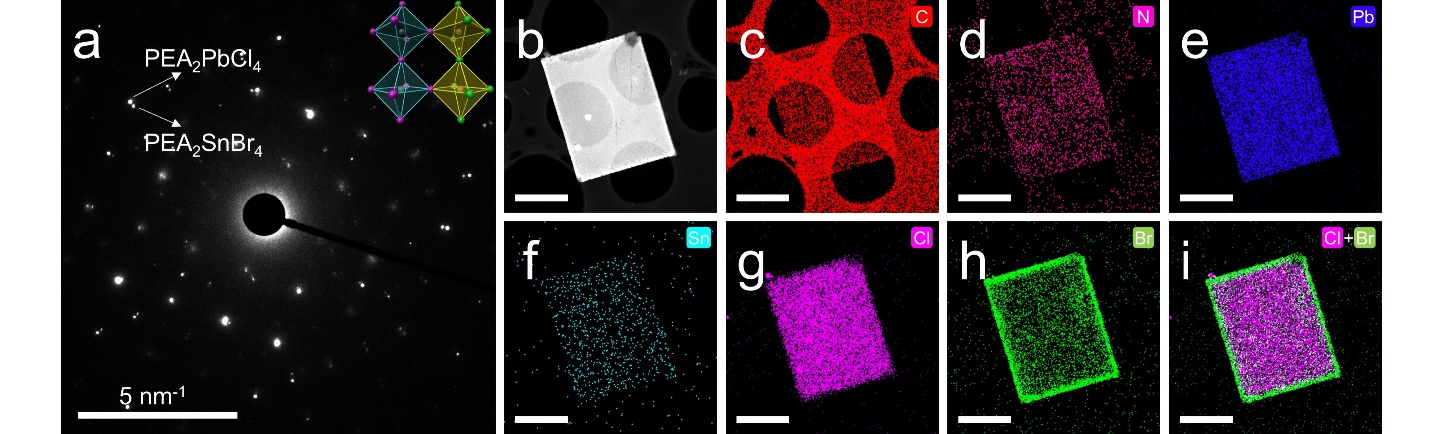


**Fig. S12. Structural characterization of** **PEA2PbCl4-PEA2PbSnBr4 heterostructure.** (**a**) SAED pattern of PEA2PbCl4-PEA2SnBr4 heterostructure, the upper right corner shows the schematic diagram of the heterostructure of the selected area. (**b**) Low-magnification TEM image of PEA2PbCl4-PEA2SnBr4 heterostructure. (**c-i**) EDS elemental mappings of PEA2PbCl4-PEA2SnBr4 heterostructure. Scale bar: 2.5 μm.


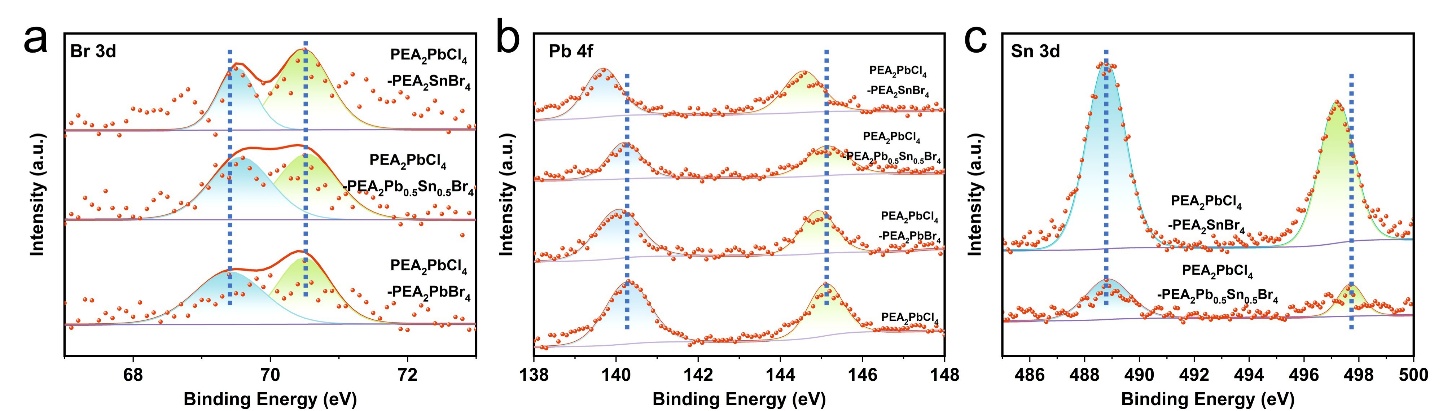


**Fig. S13. The XPS spectra of** **PEA2PbCl4 single-crystal sheets and** **PEA2PbCl4-PEA2Pb1-xSnxBr4 heterostructure.**(**a**) The XPS spectra of Br 3d for PEA2PbCl4 single-crystal sheets, PEA2PbCl4-PEA2PbBr4, PEA2PbCl4-PEA2Pb0.5Sn0.5Br4 and PEA2PbCl4-PEA2SnBr4 heterostructure. (**b**) The XPS spectra of Pb 4f for PEA2PbCl4 single-crystal sheets, PEA2PbCl4-PEA2Pb0.5Sn0.5Br4 and PEA2PbCl4-PEA2SnBr4 heterostructure. (**c**) The XPS spectra of Sn 3d for PEA2PbCl4-PEA2Pb0.5Sn0.5Br4 and PEA2PbCl4-PEA2SnBr4 heterostructure.


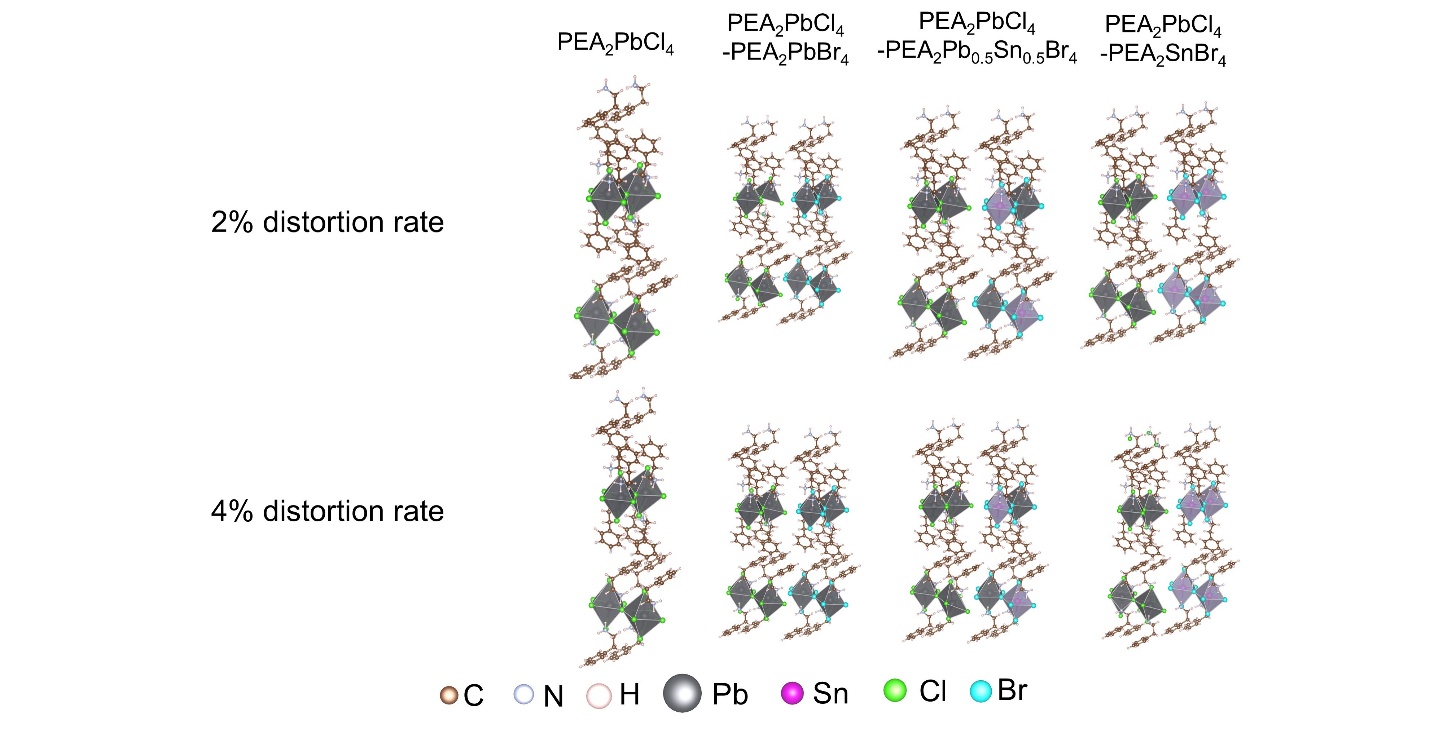


**Fig. S14.** The structural models of PEA2PbCl4 and PEA2PbCl4-PEA2Pb1-xSnxBr4.


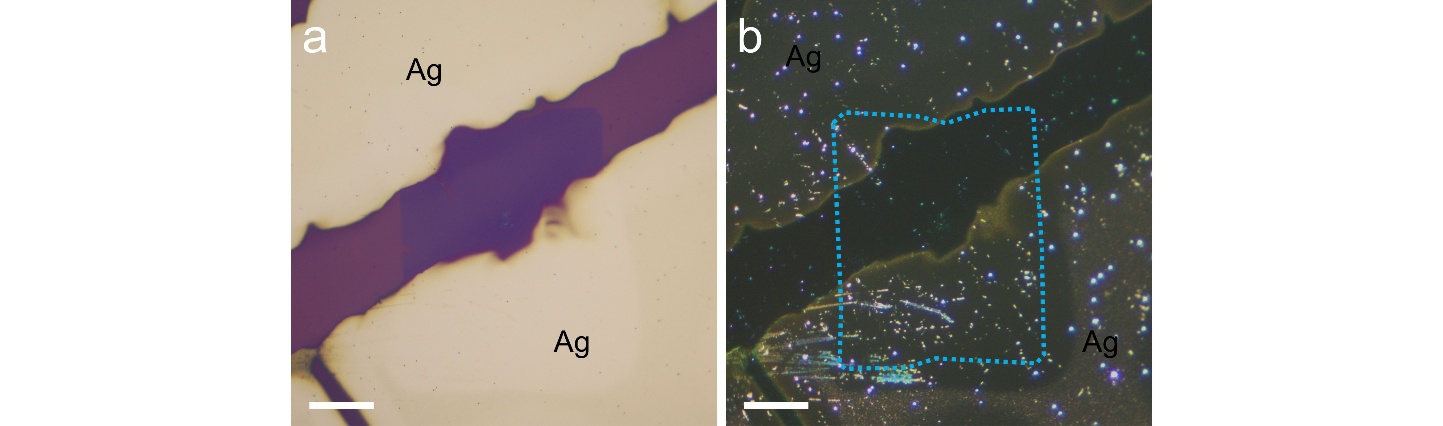


**Fig. S15. Schematic diagram of the electrical device.** (**a**) Optical Bright-field images. Scale bar: 30 μm. (**b**) Corresponding dark-field images. Scale bar: 30 μm.


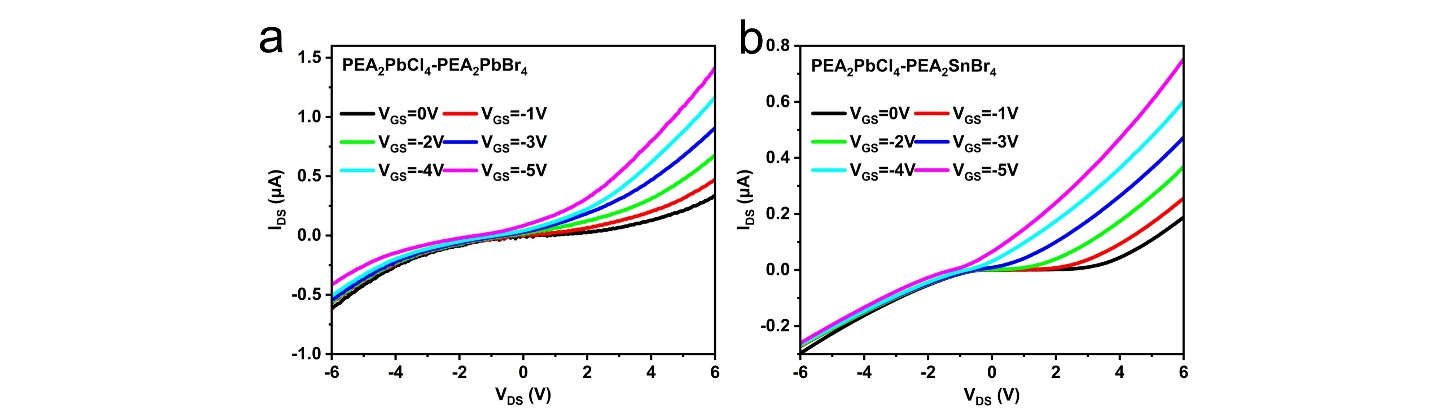


**Fig. S16.** Output characteristic curves of (**a**) PEA2PbCl4-PEA2PbBr4 and (**b**) PEA2PbCl4-PEA2SnBr4.


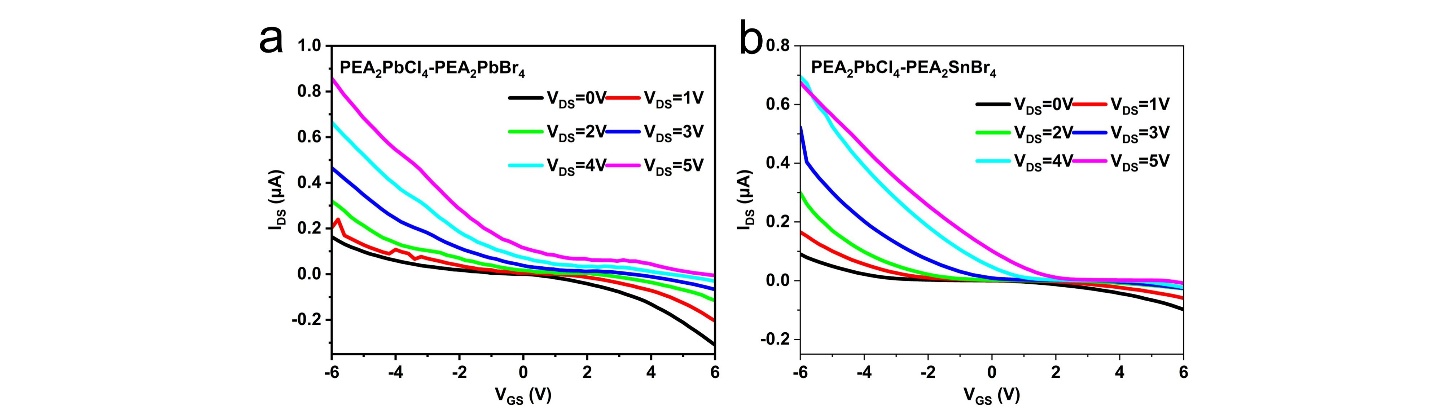


**Fig. S17.** Transfer characteristic curves of (**a**) PEA2PbCl4-PEA2PbBr4 and (**b**) PEA2PbCl4-PEA2SnBr4.


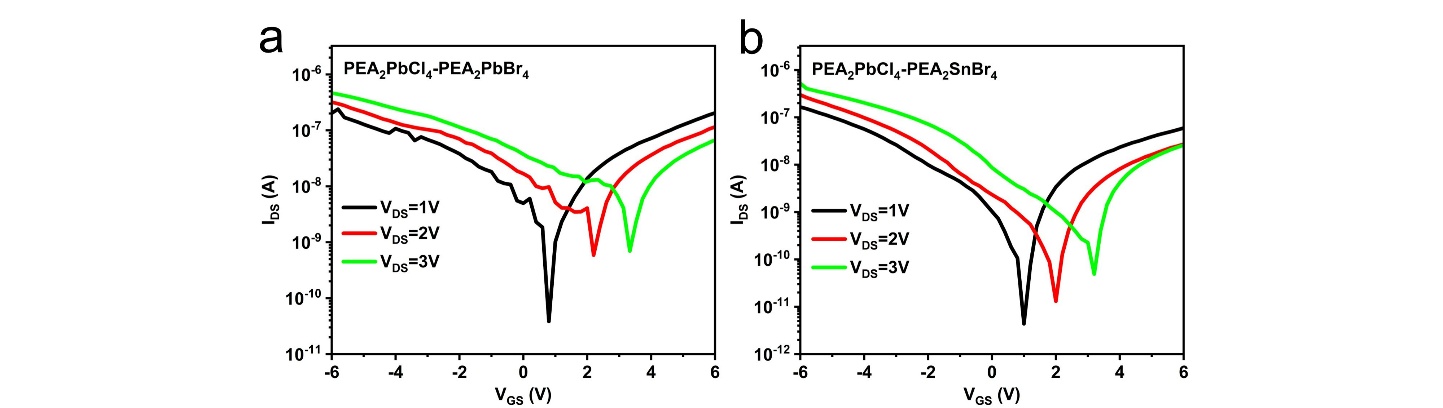


**Fig. S18.** Transfer characteristic curves of (**a**) PEA2PbCl4-PEA2PbBr4 and (**b**) PEA2PbCl4-PEA2SnBr4.

|  | VDS=1V | VDS=2V | VDS=3V |
| --- | --- | --- | --- |
| PEA2PbCl4 | 2.29 | 1.33 | 1.01 |
| PEA2PbCl4-PEA2PbBr4 | 2.98 | 1.95 | 1.62 |
| PEA2PbCl4-PEA2Pb0.5Sn0.5Br4 | 7.86 | 4.96 | 5.10 |
| PEA2PbCl4-PEA2SnBr4 | 2.36 | 1.87 | 1.89 |

**Table. 1.** Carrier mobility of PEA2PbCl4 single-crystal sheets, PEA2PbCl4-PEA2PbBr4 heterostructure, PEA2PbCl4-PEA2Pb0.5Sn0.5Br4 heterostructure and PEA2PbCl4-PEA2SnBr4 heterostructure at VDS=1V, 2V and 3V respectively.

**References**

1. Kresse. G et al., Efficient Iterative Schemes for Ab Initio Total-Energy Calculations Using a Plane-Wave Basis Set. Phys. Rev. B, **54**, 11169–11186 (1996).

2. Perdew et al., Generalized Gradient Approximation Made Simple. Phys. Rev. Lett. **77**, 3865–3868 (1996).

3. Kresse et al., From Ultrasoft Pseudopotentials to the Projector Augmented-Wave Method. Phys. Rev. B, **59**, 1758–1775 (1999).

4. Blöchl et al., Projector Augmented-Wave Method. Phys. Rev. B, **50**, 17953–17979 (1994).

5. Grimme et al., A consistent and accurate ab initio parametrization of density functional dispersion correction (DFT-D) for the 94 elements H-Pu. H. J. Chem. Phys, **132**, 154104 (2010).

6. Henkelman et al., A climbing image nudged elastic band method for finding saddle points and minimum energy paths. H. J. Chem. Phys, **113**, 9901 (2000).
